# Supplementary material for: Organic-free synthesis of zincoaluminosilicate zeolites from homogeneous gels prepared by a co-precipitation method
Source: Royal Society of Chemistry journal article supplement (doi:10.1039/c7dt02001e), 2017-01-01
Supplement: c7dt02001e1.pdf [file c7dt02001e1.pdf]

# Electronic Supplementary Information (ESI)

## Organic-free synthesis of zincoaluminosilicate zeolites from homogeneous gels prepared by a co-precipitation method

Natsume Koike,<sup>a</sup> Watcharop Chaikittisilp,<sup>a</sup> Kenta Iyoki,<sup>a</sup> Yutaka Yanaba,<sup>b</sup> Takeshi  
Yoshikawa,<sup>b</sup> Shanmugam Palani Elangovan,<sup>c</sup> Keiji Itabashi<sup>c</sup> and Tatsuya Okubo<sup>a\*</sup>

<sup>a</sup>Department of Chemical System Engineering, The University of Tokyo, 7-3-1 Hongo, Bunkyo-ku, Tokyo  
113-8656, Japan

<sup>b</sup>Institute of Industrial Science, The University of Tokyo, 4-6-1 Komaba, Meguro-ku, Tokyo, 153-8505,  
Japan

<sup>c</sup>UniZeo Co., Ltd., The University of Tokyo Entrepreneur Plaza, 7-3-1 Hongo, Bunkyo-ku, Tokyo 113-0033,  
Japan

\*E-mail: okubo@chemsys.t.u-tokyo.ac.jp

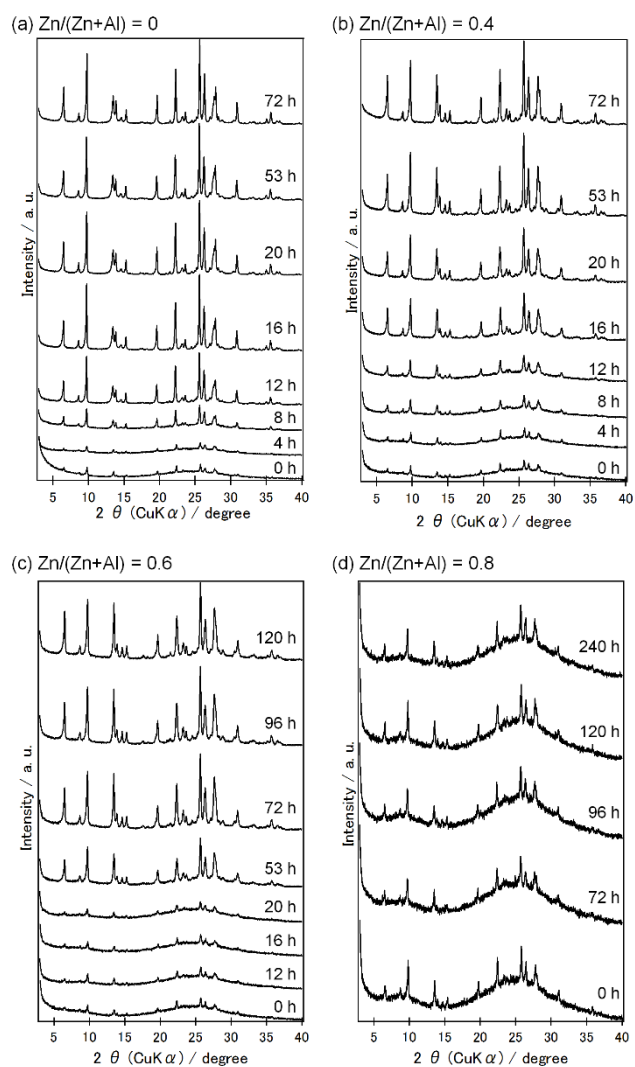

**Fig. S1** Powder XRD patterns of products synthesized for different periods of time from co-precipitated gels with Zn/(Zn+Al) of (a) 0, (b) 0.4, (c) 0.6, and (d) 0.8.

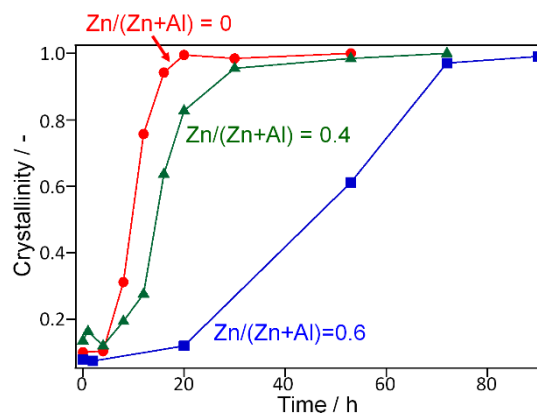

**Fig. S2** Crystallization curves of products synthesized from co-precipitated gels with Zn/(Zn+Al) of 0, 0.4, and 0.6. The crystallinity was calculated from the total areas of XRD peaks at around 19.7°, 22.4°, 25.8°, and 26.4°.

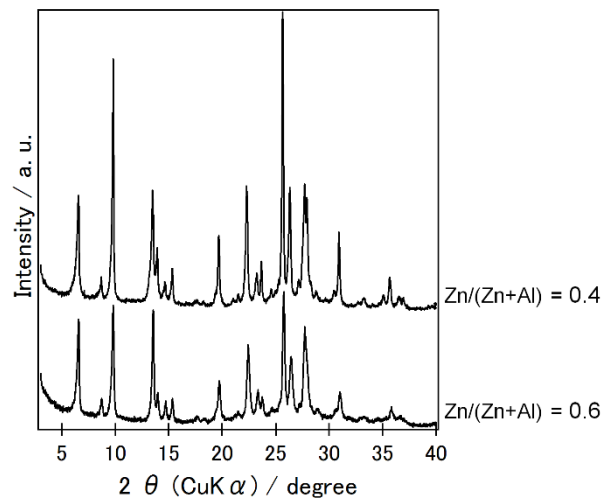

**Fig. S3** Powder XRD patterns of products synthesized using fumed silica, sodium aluminate, and zinc acetate at Zn/(Zn+Al) of 0.4 and 0.6.

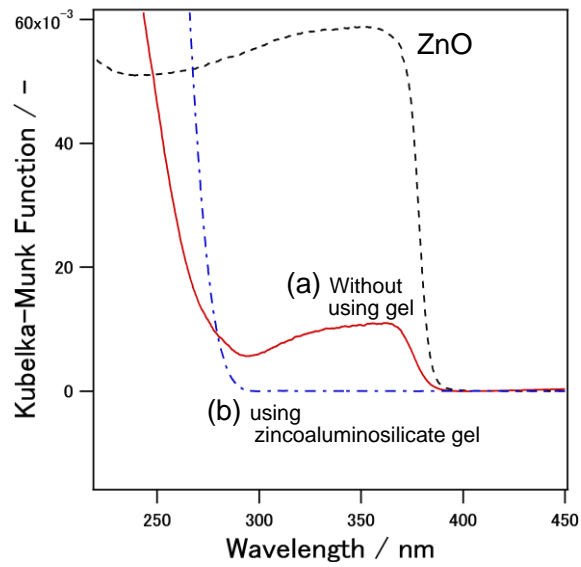

**Fig. S4** DR UV-vis spectra of products synthesized at Zn/(Zn+Al) of 0.6 using (a) conventional raw materials (fumed silica, sodium aluminate, and zinc acetate) and (b) co-precipitated zincoaluminosilicate gel.

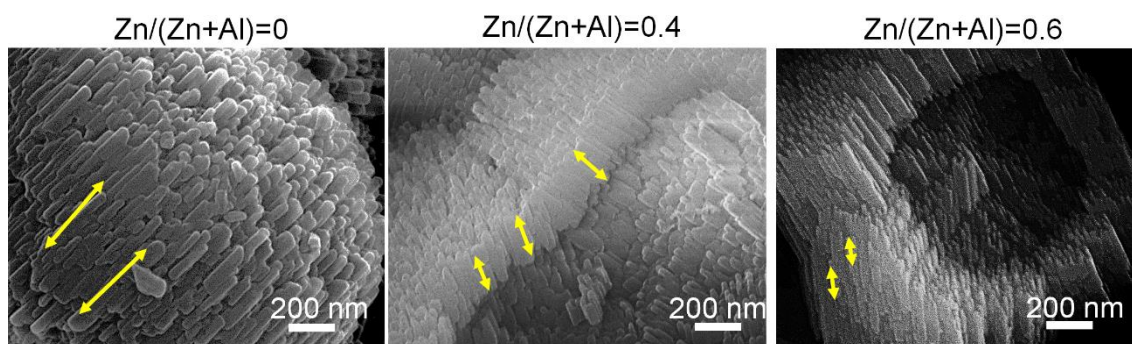

**Fig. S5** Additional FE-SEM images of products synthesized from co-precipitated gels with  $Zn/(Zn+Al)$  of 0, 0.4, and 0.6.

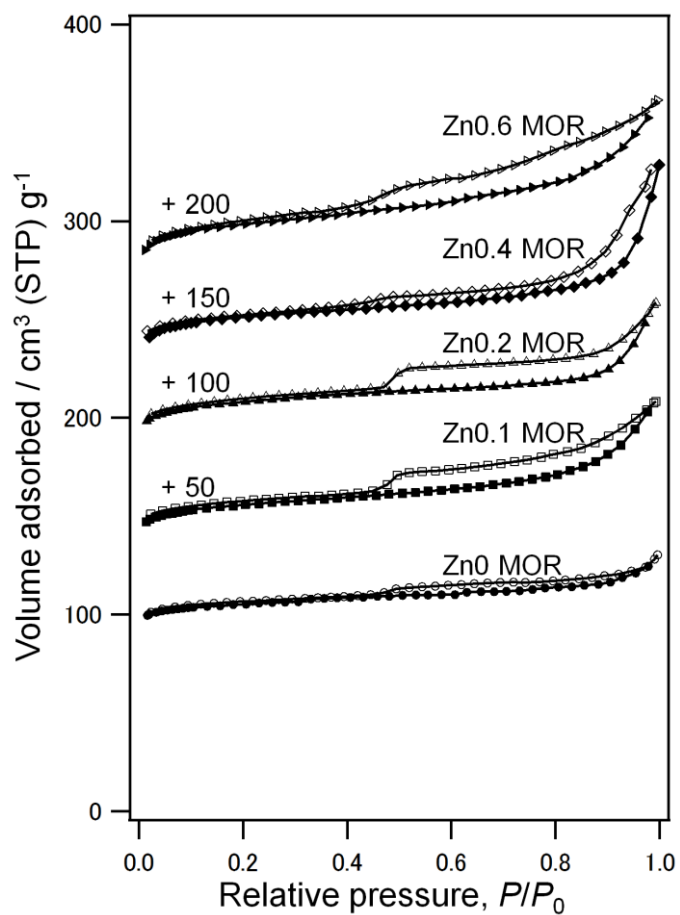

**Fig. S6** Nitrogen adsorption–desorption isotherms of Zn0 MOR, Zn0.1 MOR, Zn0.2 MOR, Zn0.4 MOR, and Zn0.6 MOR. The isotherms of Zn0.4 MOR and Zn0.6 MOR were obtained after ion-exchange with  $\text{NH}_4\text{NO}_3$  and subsequent calcination.

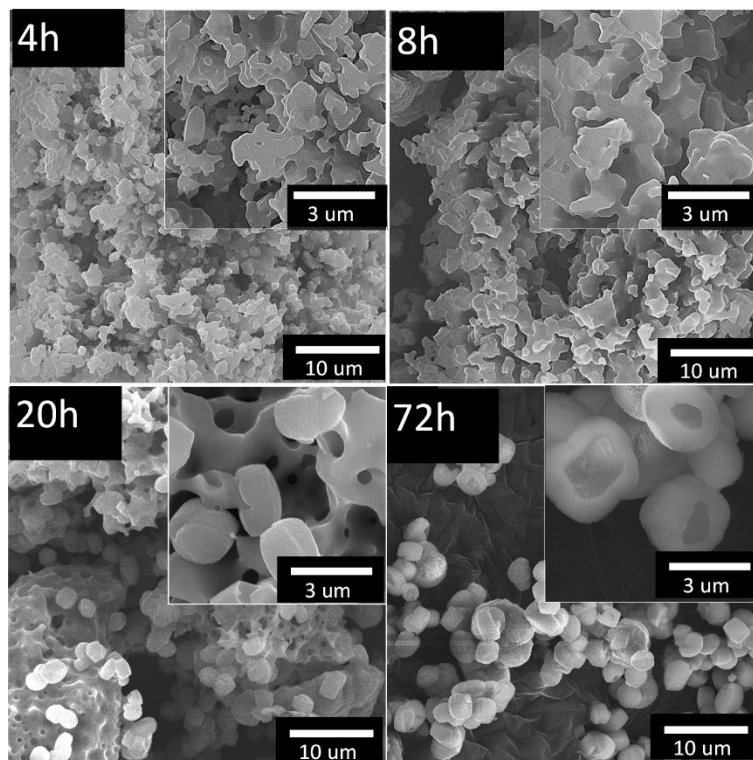

**Fig. S7** FE-SEM images of products synthesized from co-precipitated gels with Zn/(Zn+Al) of 0.4 at 150 °C for 4, 8, 20, and 72 h.
